# Supplementary material for: Simple derivation of skeletal muscle from human pluripotent stem cells using temperature‐sensitive Sendai virus vector
Source: PubMed Central journal article supplement (PMC8505837; doi:10.1111/jcmm.16899), 2021-09-12

# Figure S1

---

A

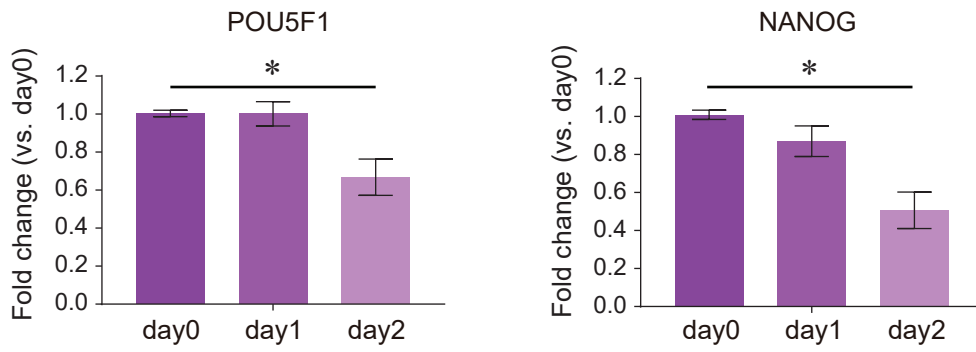

B

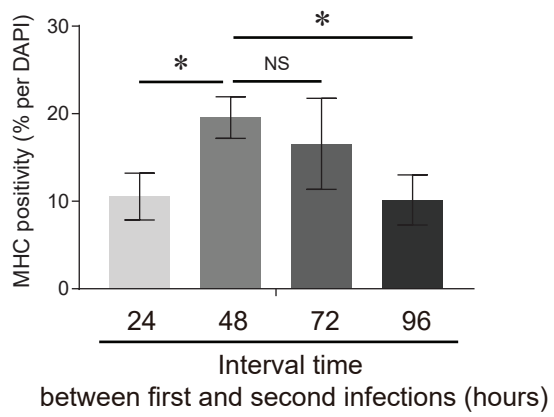

# Figure S2

A

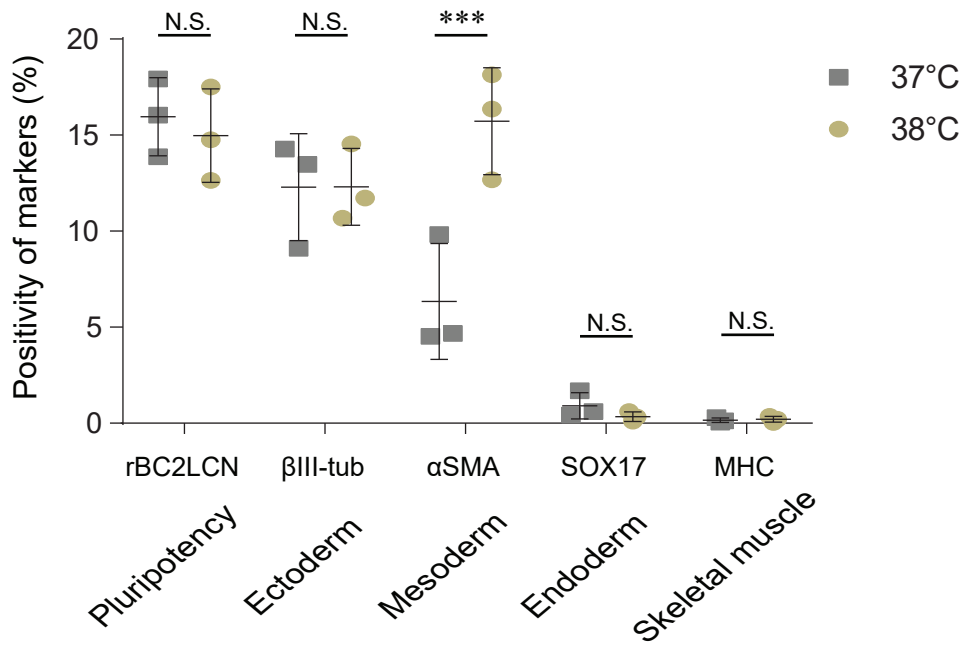

# Figure S3

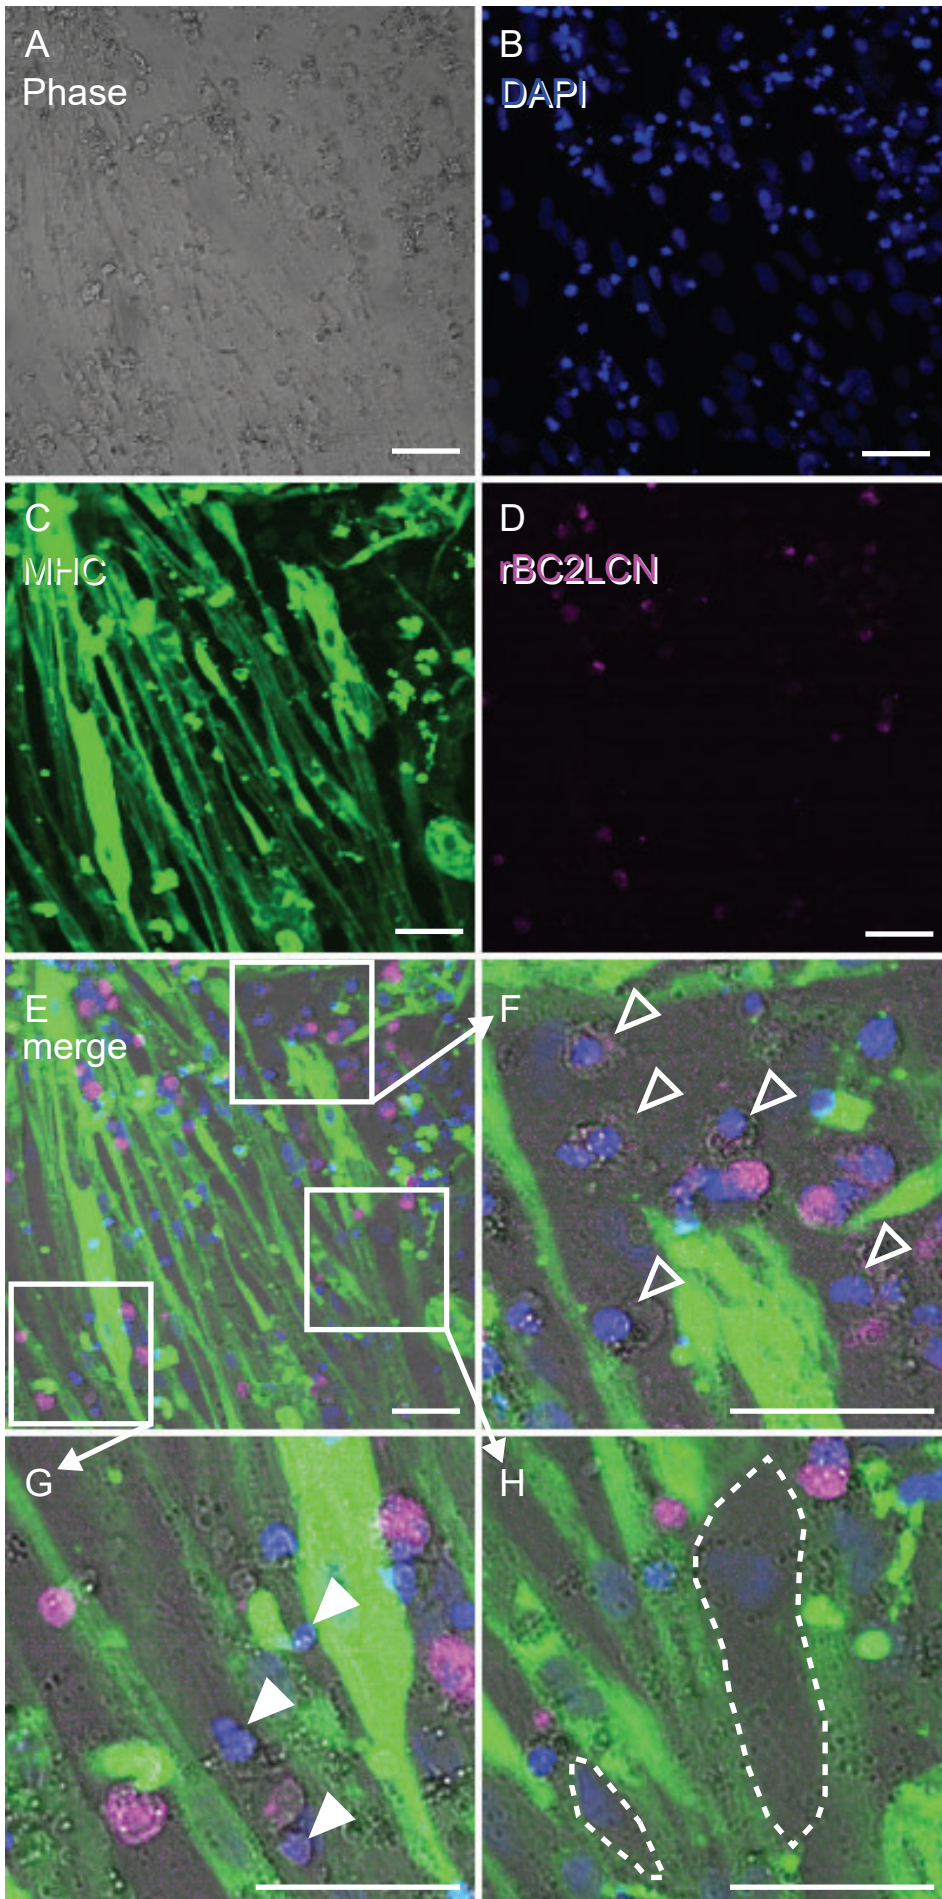

# Figure S4

A

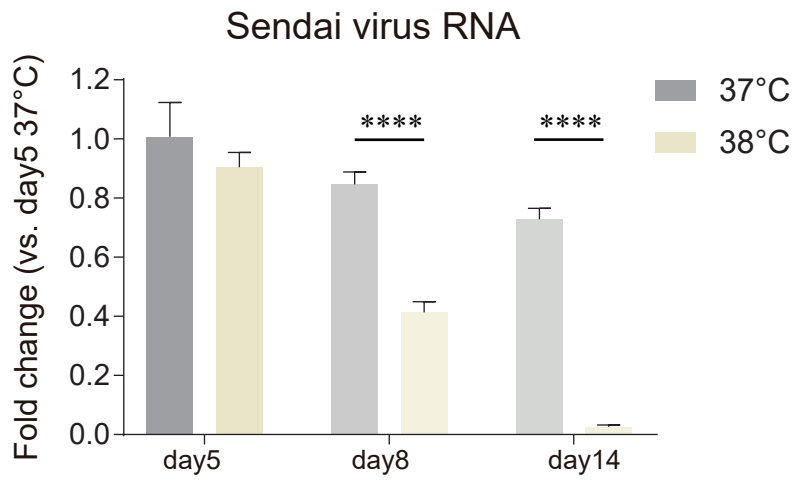

B

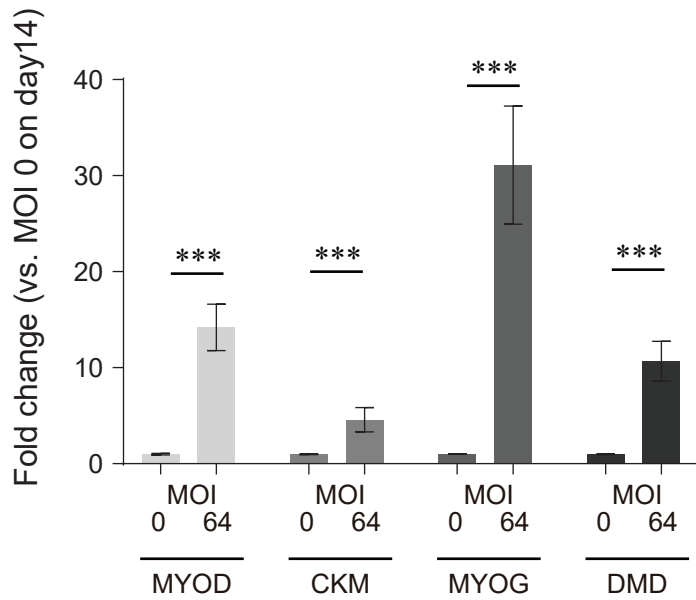

Supplement: JCMM-25-9586-s001.pdf [file JCMM-25-9586-s001.pdf]
